# Supplementary material for: Vitamin D upregulates the macrophage complement receptor immunoglobulin in innate immunity to microbial pathogens
Source: PubMed Central journal article supplement (PMC7994403; doi:10.1038/s42003-021-01943-3), 2021-03-25
Supplement: 42003_2021_1943_MOESM3_ESM.pdf [file 42003_2021_1943_MOESM3_ESM.pdf]

## **Description of Additional Supplementary Files**

**File Name:** Supplementary Data 1

**Description:** Source data behind the graphs in the paper
